# Supplementary material for: Elucidating the diversity of microeukaryotes and epi-endophytes in the brown algal holobiome
Source: bioRxiv or medRxiv preprint supplement (doi:10.1101/2021.05.09.443287), 2021-05-18

Log10 read abundance

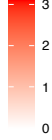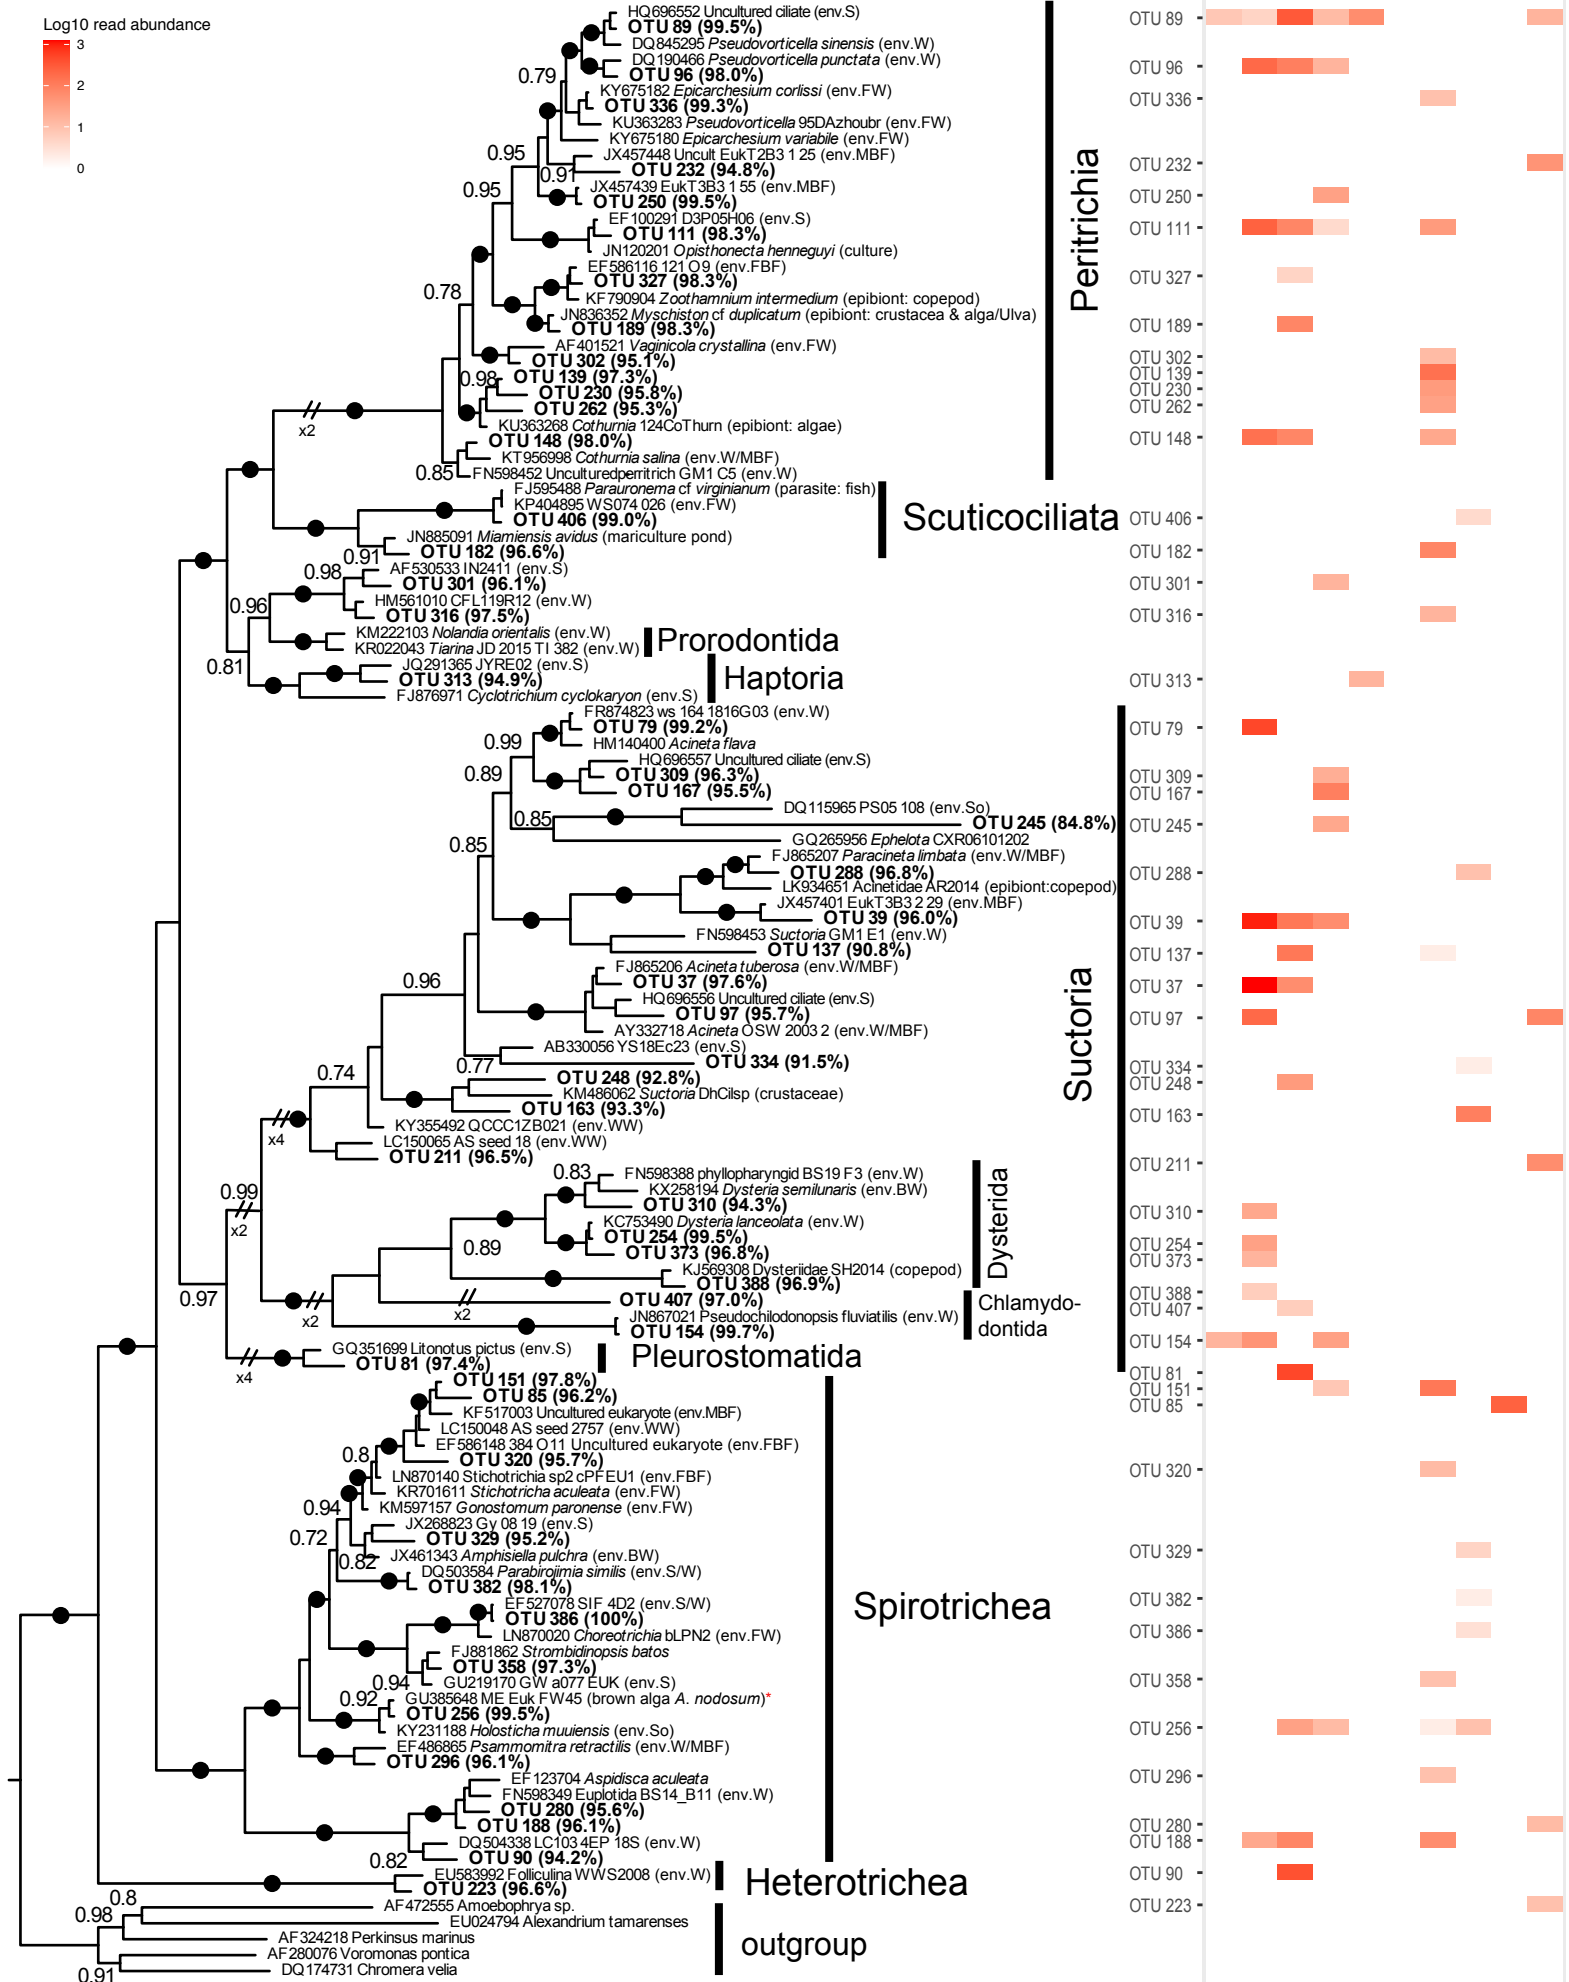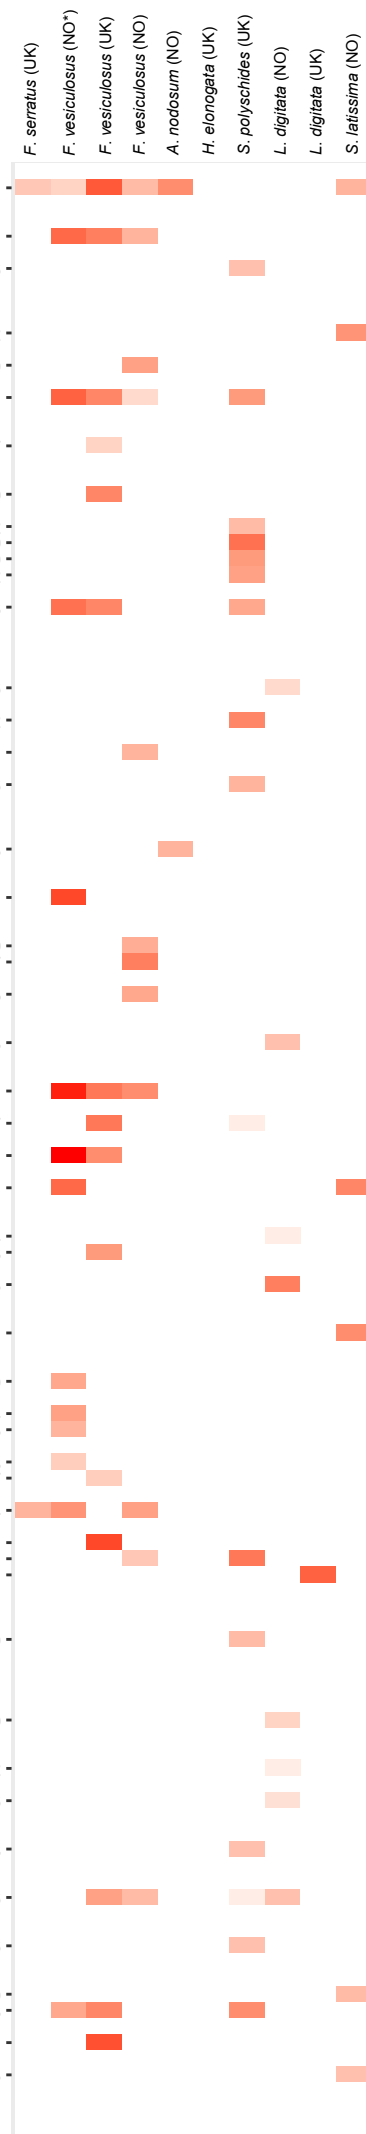

Supplement: Supplementary file [file media-1.pdf]
